# Supplementary material
Source: PubMed Central journal article supplement (PMC6983339)
Supplement: NIHMS1537597-supplement-1.pdf [file NIHMS1537597-supplement-1.pdf]

## SUPPLEMENTARY INFORMATION

*Supplementary table 1. Association of variables of interest with stage (high versus low) from univariable and multivariable Generalized linear models to estimate risk ratios*

| Factor                                       | statistic       | Stage 0 – II<br>(n=1864) | Stage III-IV<br>(n=289) | Univariable            |        | Multivariable<br>n=1517 |        |
|----------------------------------------------|-----------------|--------------------------|-------------------------|------------------------|--------|-------------------------|--------|
|                                              |                 |                          |                         | Risk ratio<br>(95% CI) | p      | Risk ratio<br>(95% CI)  | p      |
| <b>Age (years)</b>                           | <b>mean, SD</b> | 54.19 (13.68)            | 56.80 (13.09)           | 1.01 (1.00-1.02)       | 0.002  | 1.01 (1.00-1.02)        | 0.07   |
| <b>Sex</b>                                   |                 |                          |                         |                        |        |                         |        |
| Female                                       | n(%)            | 1073 (89)                | 139 (11)                | 1                      | -      | 1                       | -      |
| Male                                         |                 | 791 (84)                 | 150 (16)                | 1.39 (1.12-1.72)       | 0.003  | 1.23 (0.99-1.53)        | 0.07   |
| <b>Site</b>                                  |                 |                          |                         |                        |        |                         |        |
| Limbs                                        | n(%)            | 905 (90)                 | 103 (10)                | 1                      | -      | 1                       | -      |
| Back                                         |                 | 457 (84)                 | 85 (16)                 | 1.53 (1.17-2.01)       | 0.002  | 1.52 (1.06-2.16)        | 0.02   |
| Trunk                                        |                 | 189 (89)                 | 23 (11)                 | 1.06 (0.69-1.63)       | 0.78   | 1.19 (0.71-2.00)        | 0.50   |
| Head/neck                                    |                 | 191 (92)                 | 16 (8)                  | 0.76 (0.46-1.25)       | 0.28   | 0.80 (0.45-1.42)        | 0.44   |
| Acral/sun protected                          |                 | 122 (66)                 | 62 (34)                 | 3.30 (2.51-4.33)       | <0.001 | 3.23 (2.29-4.54)        | <0.001 |
| <b>Vitamin D<sup>1</sup> nmol/L</b>          |                 |                          |                         |                        |        |                         |        |
| 20-60                                        | n(%)            | 1032 (87)                | 149 (13)                | 1                      | -      | 1                       | -      |
| <20                                          |                 | 81 (76)                  | 25 (24)                 | 1.87 (1.29-2.72)       | 0.001  | 2.21 (1.61-3.02)        | <0.001 |
| >60                                          |                 | 434 (91)                 | 41 (9)                  | 0.68 (0.49-0.95)       | 0.02   | 0.71 (0.50-1.02)        | 0.07   |
| <b>Townsend score</b>                        |                 |                          |                         |                        |        |                         |        |
| Least deprived                               | n(%)            | 607 (87)                 | 88 (13)                 | 1                      | -      | 1                       | -      |
| Moderate                                     |                 | 618 (87)                 | 95 (13)                 | 1.05 (0.80-1.38)       | 0.71   | 0.87 (0.64-1.19)        | 0.40   |
| Most deprived                                |                 | 606 (86)                 | 97 (14)                 | 1.09 (0.83-1.43)       | 0.53   | 1.04 (0.83-1.31)        | 0.73   |
| <b>Smoking</b>                               |                 |                          |                         |                        |        |                         |        |
| Never                                        | n(%)            | 998 (87)                 | 144 (13)                | 1                      | -      | 1                       | -      |
| Ex smoker                                    |                 | 587 (85)                 | 103 (15)                | 1.18 (0.94-1.50)       | 0.16   | 0.95 (0.73-1.25)        | 0.71   |
| Smoker                                       |                 | 208 (87)                 | 31 (13)                 | 1.03 (0.72-1.48)       | 0.88   | 0.71 (0.43-1.18)        | 0.19   |
| <b>BMI</b>                                   | <b>Mean/SD</b>  | 26.79 (4.59)             | 27.09 (3.97)            | 1.01 (0.99-1.04)       | 0.30   | 1.01 (0.98-1.03)        | 0.50   |
| <b>Alcohol units/week</b>                    |                 |                          |                         |                        |        |                         |        |
| 0                                            | n(%)            | 341 (85)                 | 61 (15)                 | 0.98 (0.72-1.32)       | 0.88   | 1.16 (0.83-1.61)        | 0.38   |
| >0 ≤7                                        |                 | 468 (84)                 | 86 (16)                 | 1                      | -      | 1                       | -      |
| >7 ≤14                                       |                 | 371 (87)                 | 54 (13)                 | 0.82 (0.60-1.12)       | 0.21   | 0.70 (0.47-1.06)        | 0.09   |
| >14                                          |                 | 604 (89)                 | 71 (11)                 | 0.68 (0.51-0.91)       | 0.009  | 0.58 (0.40-0.85)        | 0.005  |
| <b>Exercise MET<sup>2</sup><br/>hrs/week</b> |                 |                          |                         |                        |        |                         |        |
| 0                                            | n(%)            | 455 (86)                 | 74 (14)                 | 1                      | -      | 1                       | -      |
| 0.1 – 10                                     |                 | 415 (88)                 | 59 (12)                 | 0.89 (0.65-1.22)       | 0.47   | 0.94 (0.64-1.37)        | 0.74   |
| 10.1 – 20                                    |                 | 499 (87)                 | 75 (13)                 | 0.93 (0.69-1.26)       | 0.65   | 1.09 (0.80-1.48)        | 0.61   |
| >20                                          |                 | 408 (86)                 | 65 (14)                 | 0.98 (0.72-1.34)       | 0.91   | 1.17 (0.80-1.71)        | 0.41   |
| <b>Financial hardship</b>                    |                 |                          |                         |                        |        |                         |        |
| 0                                            | n(%)            | 181 (92)                 | 15 (8)                  | 1                      | -      | 1                       | -      |
| 1                                            |                 | 386 (88)                 | 53 (12)                 | 1.58 (0.91-2.73)       | 0.10   | 1.35 (0.72-2.55)        | 0.35   |
| >1                                           |                 | 1124 (86)                | 189 (14)                | 1.88 (1.14-3.11)       | 0.01   | 1.66 (0.92-2.98)        | 0.09   |
| <b>Chance HLOC</b>                           |                 |                          |                         |                        |        |                         |        |

|          |      |          |          |                  |      |                  |      |
|----------|------|----------|----------|------------------|------|------------------|------|
| Low      | n(%) | 562 (87) | 81 (13)  | 1                | -    | 1                | -    |
| Moderate |      | 569 (87) | 82 (13)  | 1.00 (0.75-1.33) | 0.99 | 0.92 (0.66-1.28) | 0.64 |
| High     |      | 642 (86) | 106 (14) | 1.12 (0.86-1.47) | 0.39 | 0.99 (0.72-1.35) | 0.93 |

<sup>1</sup> Vitamin D adjusted for season and batch.

<sup>2</sup> Metabolic Equivalence of Task

Journal Pre-proof

Supplementary table 2. Association of variables of interest with Townsend deprivation score from univariable and multivariable linear regression models.

| Factor                              | Univariable             |                  | Multivariable<br>(n = 1648) |                  |
|-------------------------------------|-------------------------|------------------|-----------------------------|------------------|
|                                     | Coefficient<br>(95% CI) | <i>p</i>         | Coefficient<br>(95% CI)     | <i>p</i>         |
| <b>Vitamin D<sup>1</sup> nmol/L</b> |                         |                  |                             |                  |
| 20-60                               | Reference               | -                | Reference                   | -                |
| <20                                 | 0.38 (-0.72, -0.08)     | 0.21             | 0.05 (-0.58, 0.68)          | 0.87             |
| >60                                 | -0.40 (-0.72, -0.08)    | <b>0.02</b>      | -0.30 (-0.63, 0.03)         | 0.07             |
| <b>Smoking</b>                      |                         |                  |                             |                  |
| Never                               | Reference               | -                | Reference                   | -                |
| Ex smoker                           | 0.38 (0.1, 0.65)        | 0.09             | 0.17 (-0.15, 0.50)          | 0.28             |
| Smoker                              | 1.25 (0.84, 1.66)       | <b>&lt;0.001</b> | 1.05 (0.57, 1.52)           | <b>&lt;0.001</b> |
| <b>BMI</b>                          | 0.06 (0.03, 0.09)       | <b>&lt;0.001</b> | 0.06 (0.03, 0.09)           | <b>0.001</b>     |
| <b>Alcohol units/week</b>           |                         |                  |                             |                  |
| 0                                   | 0.28 (-0.10, 0.66)      | 0.14             | 0.12 (-0.32, 0.56)          | 0.60             |
| >0 ≤7                               | Reference               | -                | Reference                   | -                |
| >7 ≤14                              | -0.33 (-0.71, 0.04)     | 0.08             | -0.44 (-0.87, -0.01)        | 0.05             |
| >14                                 | -0.19 (-0.52, 0.15)     | 0.27             | -0.32 (-0.71, 0.06)         | 0.10             |
| <b>Financial hardship</b>           |                         |                  |                             |                  |
| 0                                   | Reference               | -                | Reference                   | -                |
| 1                                   | -0.40 (-0.89, 0.10)     | 0.11             | -0.52 (-1.06, 0.01)         | 0.06             |
| >1                                  | 0.29 (-0.15, 0.73)      | 0.20             | 0.01 (-0.38, 0.58)          | 0.68             |
| <b>Chance HLOC</b>                  |                         |                  |                             |                  |
| Low                                 | Reference               | -                | Reference                   | -                |
| Moderate                            | 0.009 (-0.32, 0.34)     | 0.96             | 0.01 (-0.38, 0.35)          | 0.94             |
| High                                | -0.008 (-0.32, 0.31)    | 0.96             | -0.11 (-0.46, 0.25)         | 0.56             |

<sup>1</sup> Vitamin D adjusted for season and batch.

Supplementary table 3. Questions used to create psychosocial variables.

| <b>Variable</b>                                                                                    |                                                                     |                                                                                                 |
|----------------------------------------------------------------------------------------------------|---------------------------------------------------------------------|-------------------------------------------------------------------------------------------------|
| <b>Financial Hardship</b>                                                                          | <b>Housing problems</b>                                             | <b>Negative life events (within the past 2 years)</b>                                           |
| Have you ever been forced to give up work due to redundancy, enforced early retirement or illness? | Is there objective overcrowding? (calculated by person per room)    | Have you or a loved one ever been seriously ill?                                                |
| Do you feel that your income now is enough to support you and your family?                         | Is your housing adequate in terms of space for you and your family? | Has a loved one or yourself been in a serious accident?                                         |
| Have you earned more in the past?                                                                  | Is your housing too cold in the winter or damp?                     | Have you or your partner miscarried or had an abortion                                          |
| Do you have any unpaid credit card bills?                                                          | Do you feel safe in your neighborhood?                              | Have you been separated or divorced?                                                            |
| Do you have any difficulty paying your mortgage?                                                   | Do you have good neighbors overall?                                 | Have you been worried about any important relationship with someone?                            |
| Do you feel financially secure?                                                                    |                                                                     | Have you or someone very close to you had major money problems?                                 |
| Can you afford to run a car?                                                                       |                                                                     | Have you or someone very close to you been convicted of any offence or given a prison sentence? |
| Can you take holidays where and when you want to?                                                  |                                                                     | Have you been burgled or suffered serious loss or damage to any property?                       |
|                                                                                                    |                                                                     | Has anyone close to you died?                                                                   |
